# Supplementary material for: Aging amplifies a gut microbiota immunogenic signature linked to heightened inflammation
Source: PubMed Central journal article supplement (PMC11320341; doi:10.1111/acel.14190), 2024-05-09
Supplement: ACEL-23-e14190-s001.pdf [file ACEL-23-e14190-s001.pdf]

**Ageing amplifies a gut microbiota immunogenic signature linked to heightened inflammation**

**Table S1.** Primers (Forward and Reverse, Integrated DNA Technologies, Coralville, IA) used for Fluidigm analysis.

| <b>Gene</b>    | <b>Forward sequence</b>  | <b>Reverse sequence</b>  |
|----------------|--------------------------|--------------------------|
| <i>ApoE</i>    | GACCCAGCAAATACGCCTG      | CATGTCTTCCACTATTGGCTCG   |
| <i>B3galt5</i> | AGGCTAGTTTACGCCTCCATT    | AGGAACTTCCCCTGACTTTTCT   |
| <i>Bcl6</i>    | CCGGCACGCTAGTGATGTT      | TGTCTTATGGGCTCTAAACTGCT  |
| <i>Ccnd1</i>   | GCGTACCCTGACACCAATCTC    | ACTTGAAGTAAGATACGGAGGGC  |
| <i>Ccr2</i>    | GCTGTGTTTGCCTCTCTACCAG   | CAAGTAGAGGCAGGATCAGGCT   |
| <i>Cd55</i>    | ACCCCGGTGCATAGAGAAATC    | GGATGACGTAAGTGTGCTTGG    |
| <i>Clca4b</i>  | TGTCACCTGGAGCAAACAAGCC   | CCAGGTTGTAAGTCCAAACGCC   |
| <i>Cldn1</i>   | GCCATCTACGAGGGACTGTG     | ACTAATGTCGCCAGACCTGAAA   |
| <i>Cldn2</i>   | TCTCTGTGGTGGGCATGAGA     | CCAGCGGCGAGTAGAAGTC      |
| <i>Cldn3</i>   | ACTGCGTACAAGACGAGACG     | CGGGCACCAACGGGTTATAG     |
| <i>Creb3l3</i> | CAGTCAGCTCAAGAAAGCAGG    | TGGTTCTGGGCAGTACACG      |
| <i>Cxcl10</i>  | GTGGGACTCAAGGGATCCCTC    | CAGGATAGGCTCGCAGGGATG    |
| <i>Cxcl2</i>   | CGCTGTCAATGCCTGAAGAC     | ACACTCAAGCTCTGGATGTTCTTG |
| <i>Degs2</i>   | AGCGACTTCGAGTGGGTCTA     | GAGAGTCCCCGTAATAACCAG    |
| <i>Duox2</i>   | ACCCTGGACCTCTATTTCAG     | ACAGCCCATTCTTAGTGT       |
| <i>Duoxa2</i>  | ACCGCTGCTCATTGTTATCC     | AGTGCACAGCCACAATTTTCG    |
| <i>F2</i>      | TTCGACCCCGAGGTGAAACT     | CCCCGCAACATAGCACCAT      |
| <i>Fut1</i>    | TACCTCATCCATTGCAGACATCT  | CTCCTGGGGTGATTGTCCAAG    |
| <i>Fut2</i>    | ACCTCCAGCAACGAATAGTGA    | GCCGATGGAATTGATCGTGAA    |
| <i>Gda</i>     | AGGAGTGGTGCTTCAAACCAT    | GGGATGAGTCAGTGTGAATTGT   |
| <i>Gpx2</i>    | ATGGCTTACATTGCCAAGTCG    | TGCCTCTGAACGTATTGAAGTC   |
| <i>Hc</i>      | GAACAAACCTACGTCATTTTCAGC | GTCAACAGTGCCGCGTTTT      |
| <i>Ido1</i>    | GCTTTGCTCTACCACATCCAC    | AGCTGCCCGTTCTCAATCAG     |
| <i>Il10</i>    | GCTGAAGACCCTCAGGATGCG    | CCTGCTCCACTGCCTTGCTCT    |
| <i>Il17a</i>   | ACTACCTCAACCGTTCCA       | GAGGGATATCTATCAGGGTC     |
| <i>Il1b</i>    | GCACTACAGGCTCCGAGATGAAC  | TTGTCGTTGCTTGGTTCTCCTTGT |
| <i>Il22</i>    | CCTGACCAAACCTCAGCAATC    | GCCTTCTGACATTCTTCTGG     |
| <i>Il23a</i>   | CAAGGACAACAGCCAGTTCTGCTT | AGGCTCCCCTTTGAAGATGTCAGA |
| <i>Il6</i>     | GACTGATGCTGGTGACAAC      | ATCCTCTGTGAAGTCTCCTC     |
| <i>Irs1</i>    | CTCCTGCTAACATCCACCTTG    | AGCTCGCTAACTGAGATAGTCAT  |
| <i>Itgb6</i>   | ATGGGGATTGAGCTGGTCTG     | GACAGGTGGGTGAAATTCTCC    |
| <i>Jak3</i>    | CCATCACGTTAGACTTTGCCA    | GGCGGAGAATATAGGTGCCTG    |
| <i>Lbp</i>     | TCCATCGGTGTCCGAGGCAAAT   | AGGTCCACTGAAATGGTGACACC  |
| <i>Ly6a</i>    | AGGAGGCAGCAGTTATTGTGG    | CGTTGACCTTAGTACCCAGGA    |
| <i>Ly6cl</i>   | GCAGTGCTACGAGTGCTATGG    | ACTGACGGGTCTTTAGTTTCCTT  |

|                 |                         |                          |
|-----------------|-------------------------|--------------------------|
| <i>Muc1</i>     | GGCATTCTGGGCTCCTTTCTT   | TGGAGTGGTAGTCGATGCTAAG   |
| <i>Muc13</i>    | GACAGCAGTAAATGCCAGGAC   | GCTGAGAGCACGTTACAGCAA    |
| <i>Muc2</i>     | AGGGCTCGGAACTCCAGAAA    | CCAGGGAATCGGTAGACATCG    |
| <i>Myd88</i>    | AGGACAAACGCCGGAACCTTT   | GCCGATAGTCTGTCTGTTCTAGT  |
| <i>Nlrp3</i>    | ATTACCCGCCCGAGAAAGG     | TCGCAGCAAAGATCCACACAG    |
| <i>Nos2</i>     | AGTGAAAAGTCGAGCCGCA     | ACAATCCACAACCTCGCTCCA    |
| <i>Ocln</i>     | TTGAAAGTCCACCTCCTTACAGA | CCGGATAAAAAGAGTACGCTGG   |
| <i>Ptk6</i>     | CTCAGGCCGTGCGACATTA     | GTCTTATGGTAGTCCACAAGCTC  |
| <i>RelA</i>     | TCCTGTTTCGAGTCTCCATGCAG | GGTCTCATAGGTCCTTTTGC     |
| <i>S100a8</i>   | AAATCACCATGCCCTCTACAAG  | CCCCTTTTATCACCATCGCAA    |
| <i>S100a9</i>   | ATACTCTAGGAAGGAAGGACACC | TCCATGATGTCATTTATGAGGGC  |
| <i>Saa1</i>     | GGAGTCTGGGCTGCTGAGAAA   | TGTCTGTTGGCTTCTGGTCAG    |
| <i>Saa2</i>     | TGGCTGGAAAGATGGAGACAA   | AAAGCTCTCTTGCATCACTG     |
| <i>Saa3</i>     | AACTATGATGCTGCCCGGAG    | GCTCCATGTCCCGTGAACCTT    |
| <i>Sbno2</i>    | TTCGCTGCGCTCAACAAGGA    | TGACAGGGAATCCACAGATGAA   |
| <i>Sirt1</i>    | TGATTGGCACCGATCCTCG     | CCACAGCGTCATATCATCCAG    |
| <i>Socs3</i>    | ATGGTCACCCACAGCAAGTTT   | TCCAGTAGAATCCGCTCTCCT    |
| <i>Sphk1</i>    | ATGGAACCAGTAGAATGCCCT   | TCCGTTCCGGTGAGTATCAGTTA  |
| <i>St8sial1</i> | GCTACCCGTAGGAGCCAGT     | CAGCACCCCTTGACAATCT      |
| <i>Stat3</i>    | GTAGTGCTGCCCGTACCTG     | AGCGACTCAAACCTGCCCTCC    |
| <i>Tff3</i>     | TCCAAGCCAATGTATGGTGCCG  | CAGGGCACATTTGGGATACTGG   |
| <i>Tirap</i>    | ATCTCCAGGAAAGCCACCTCT   | GGTAGGTGACATTCCTGAACTGC  |
| <i>Tjp1</i>     | GCTTTAGCGAACAGAAGGAGC   | TTCATTTTTCCGAGACTTCACCA  |
| <i>Tlr2</i>     | CAACAAGATCACCTACATTGGC  | GACTTCAACATCAGAACCCTGGA  |
| <i>Tlr4</i>     | CGGGAGAATCCTGTGGACAA    | CTCAGACTCGGCACTTAGCA     |
| <i>Tnf</i>      | AGGCACTCCCCAAAAGATG     | GTAGACAGAAGAGCGTGGTGG    |
| <i>Tnfrsf1b</i> | ACACCCTACAAACCGGAACC    | AGCCTTCCTGTTCATAGTATTCCT |
| <i>Xdh</i>      | GTTGGTTTCAGCGTCAGGAG    | CCCAAGTGGCAGTTTTGAGT     |
